# Supplementary material for: Gonadotropin Releasing Hormone Agonists Have an Anti-apoptotic Effect on Cumulus Cells
Source: PubMed Central journal article supplement (PMC6928931; doi:10.3390/ijms20236045), 2019-11-30
Supplement: ijms-20-06045-s001.pdf [file ijms-20-06045-s001.pdf]

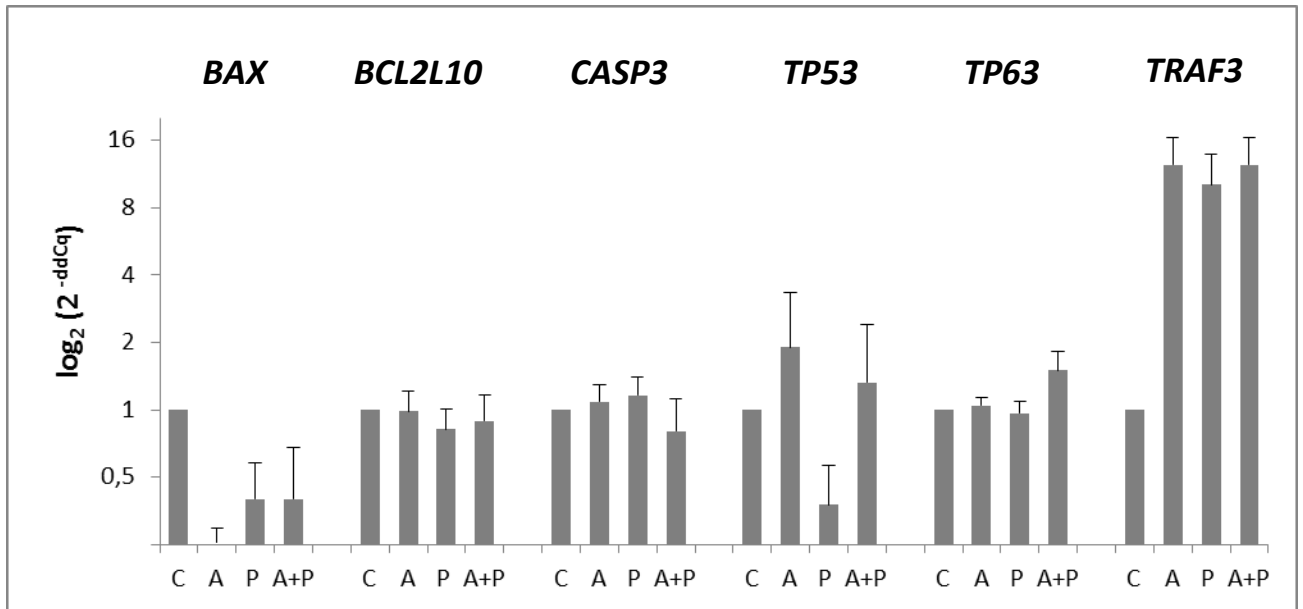

(A)

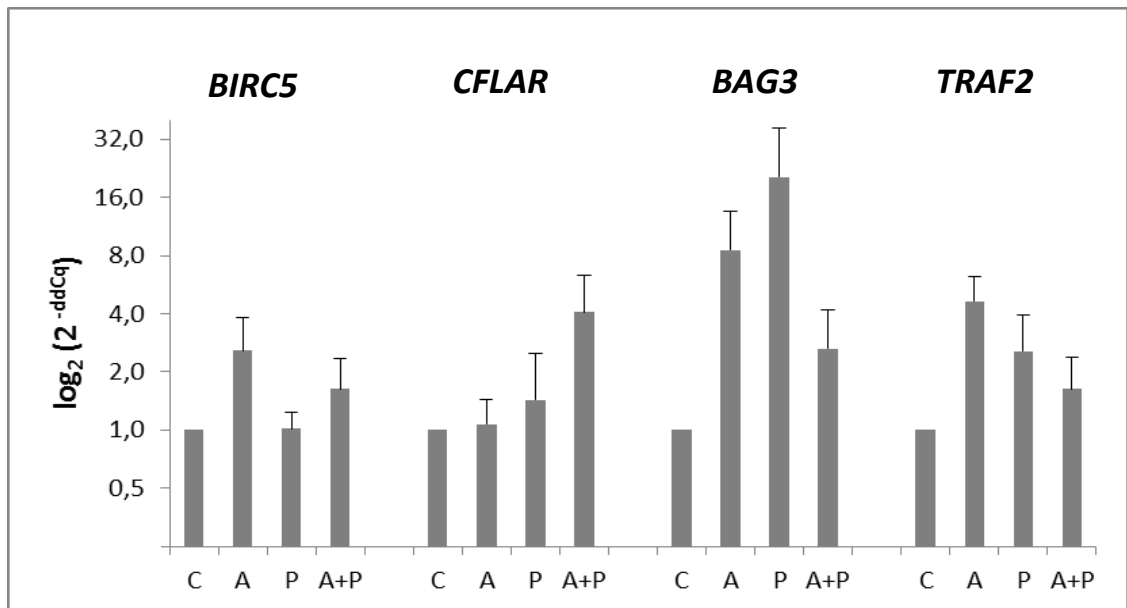

(B)

**Supplementary Figure 1:** (A) Expression levels of *BAX*, *BCL2L10*, *CASP3*, *TP53*, *TP63*, *TRAF3* apoptotic genes in oocytes of COC cultured without the addition of drugs (control, C), treated with GnRHa (A), phosphoramidate mustard (P), and GnRHa+phosphoramidate mustard (A+P); (B) Expression levels of *BIRC5*, *CFLAR*, *BAG3*, *TRAF2* anti-apoptotic genes in oocytes of COC cultured without the addition of drugs (control, C), treated with GnRHa (A), phosphoramidate mustard (P), and GnRHa+phosphoramidate mustard (A+P). Results are expressed as  $\log_2(2^{-ddCq})$  values using *HPRT1* as reference gene and C group as calibrator. Error bars denote standard error.

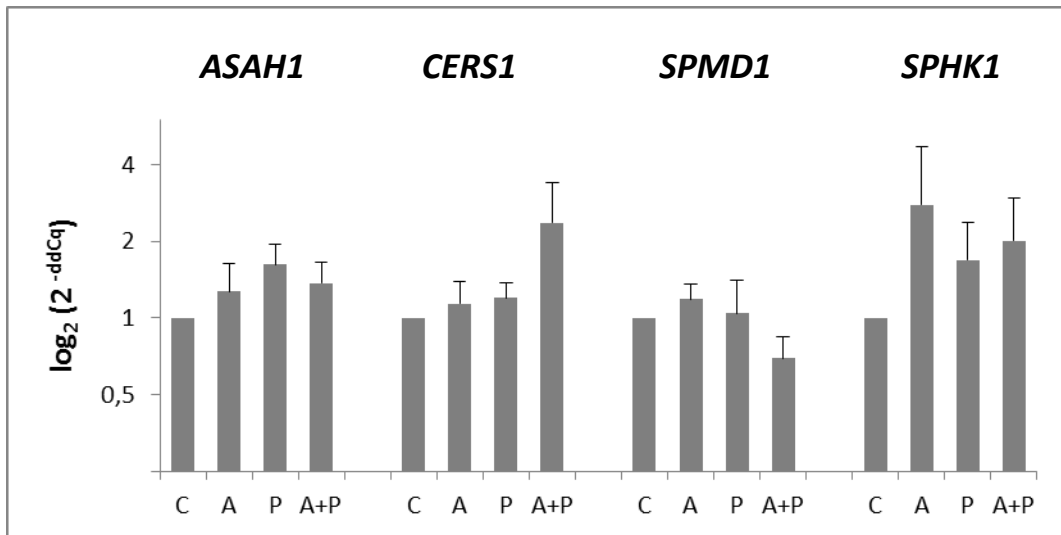

(A)

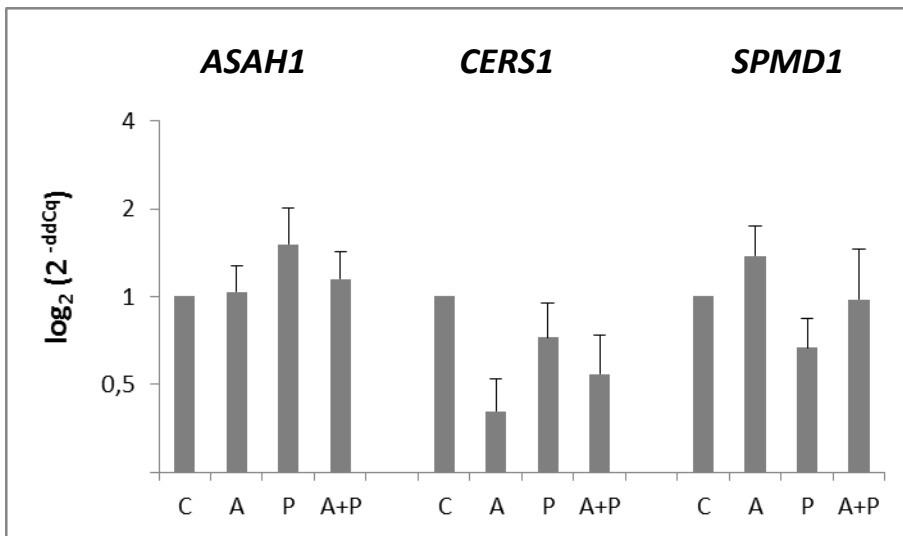

(B)

**Supplementary Figure 2:** (A) Expression levels of sphingomyelin pathway genes in CC of COC cultured without the addition of drugs (control, C), treated with GnRHa (A), phosphoramid mustard (P), and GnRHa+phosphoramid mustard (A+P); (B) Expression levels of sphingomyelin pathway genes in oocytes of COC cultured without the addition of drugs (control, C), treated with GnRHa (A), phosphoramid mustard (P), and GnRHa+phosphoramid mustard (A+P). Results are expressed as  $\log_2(2^{-ddCq})$  values using *HPRT1* as reference gene and C group as calibrator. Error bars denote standard error.
